# Supplementary material for: Adsorption behavior of magnetic bentonite for removing Hg(ii) from aqueous solutions
Source: Royal Society of Chemistry journal article supplement (doi:10.1039/c8ra05247f), 2018-01-01
Supplement: c8ra05247f1.pdf [file c8ra05247f1.pdf]

## Adsorption behavior of magnetic bentonite for removing Hg(II) from aqueous solutions

Chenglong Zou <sup>a</sup>, Jiyan Liang\* <sup>a</sup>, Wei Jiang <sup>a</sup>, Yinyan Guan <sup>a</sup> and Yichen Zhang <sup>a</sup>

(a. School of Science, Shenyang University of Technology, Shenyang, 110870, Liaoning, China.)

### Supplementary information

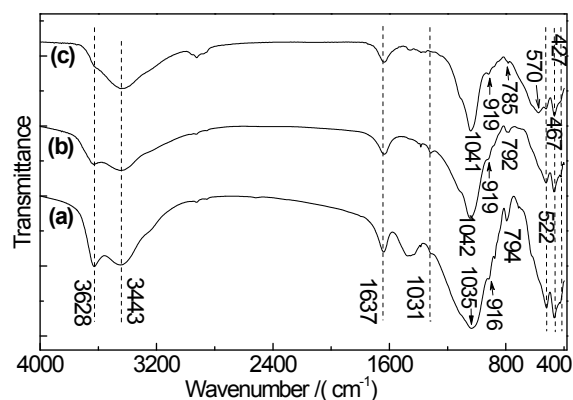

Supplementary Figure 1 FT-IR spectra of the (a) Na-B, (b) Al-B, and (c) M-B samples.

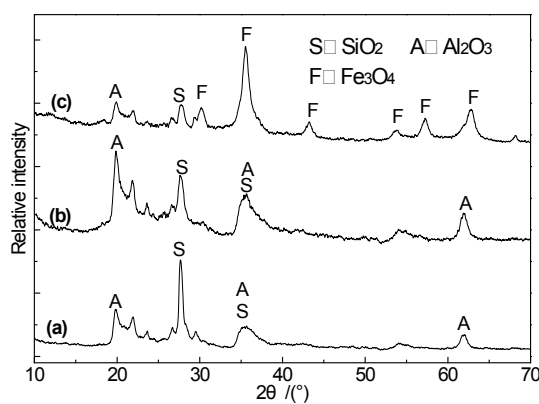

Supplementary Figure 2 XRD patterns of (a) Na-B, (b) Al-B, and (c) M-B samples.

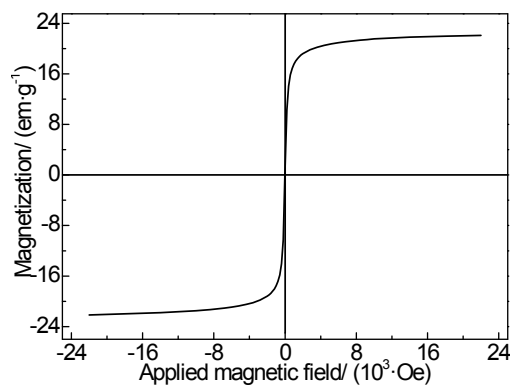

Supplementary Figure 3 Magnetization curves of M-B
